# Supplementary material for: Synthesis of Ag–Ag2S Janus nanoparticles supported on an environmentally benign cellulose template and their catalytic applications
Source: Royal Society of Chemistry journal article supplement (doi:10.1039/c6ra16941d), 2016-01-01
Supplement: c6ra16941d1.pdf [file c6ra16941d1.pdf]

## Synthesis of Ag-Ag<sub>2</sub>S Janus nanoparticles supported on environmentally benign cellulose template and their catalytic applications

Dipanka Dutta<sup>a\*</sup>, Rupjyoti Hazarika<sup>a</sup>, Pallavi Dowarah Dutta<sup>a</sup>, Tridip Goswami<sup>a</sup>,  
Pinaki Sengupta<sup>b</sup> & Dipak Kumar Dutta<sup>b</sup>

<sup>a</sup>Cellulose Pulp & Paper Group, <sup>b</sup>Advanced Materials Group  
Materials Sciences & Technology Division,  
CSIR-North East Institute of Science and Technology,  
Jorhat, 785 006, Assam, India

\*Corresponding Author: Tel: +91-376-2370 012, Fax: +91-376-2370 011.  
E-mail: [dutta.dipanka@gmail.com](mailto:dutta.dipanka@gmail.com), [dipanka@rrl.jorhat.res.in](mailto:dipanka@rrl.jorhat.res.in)

---

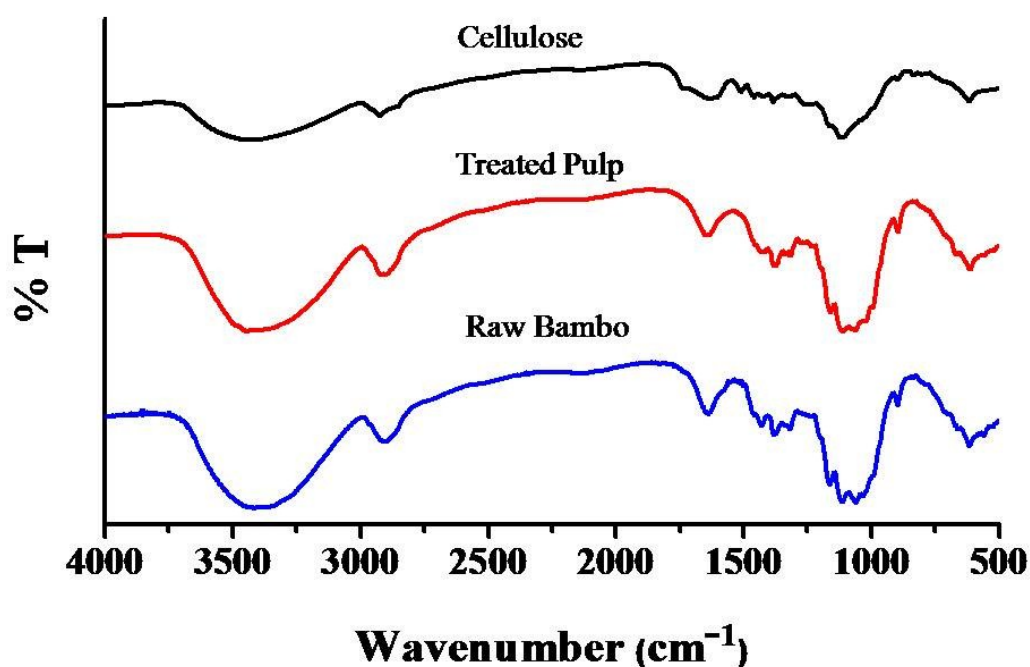

Fig.S1: FTIR spectra of raw bamboo, treated pulp and cellulose

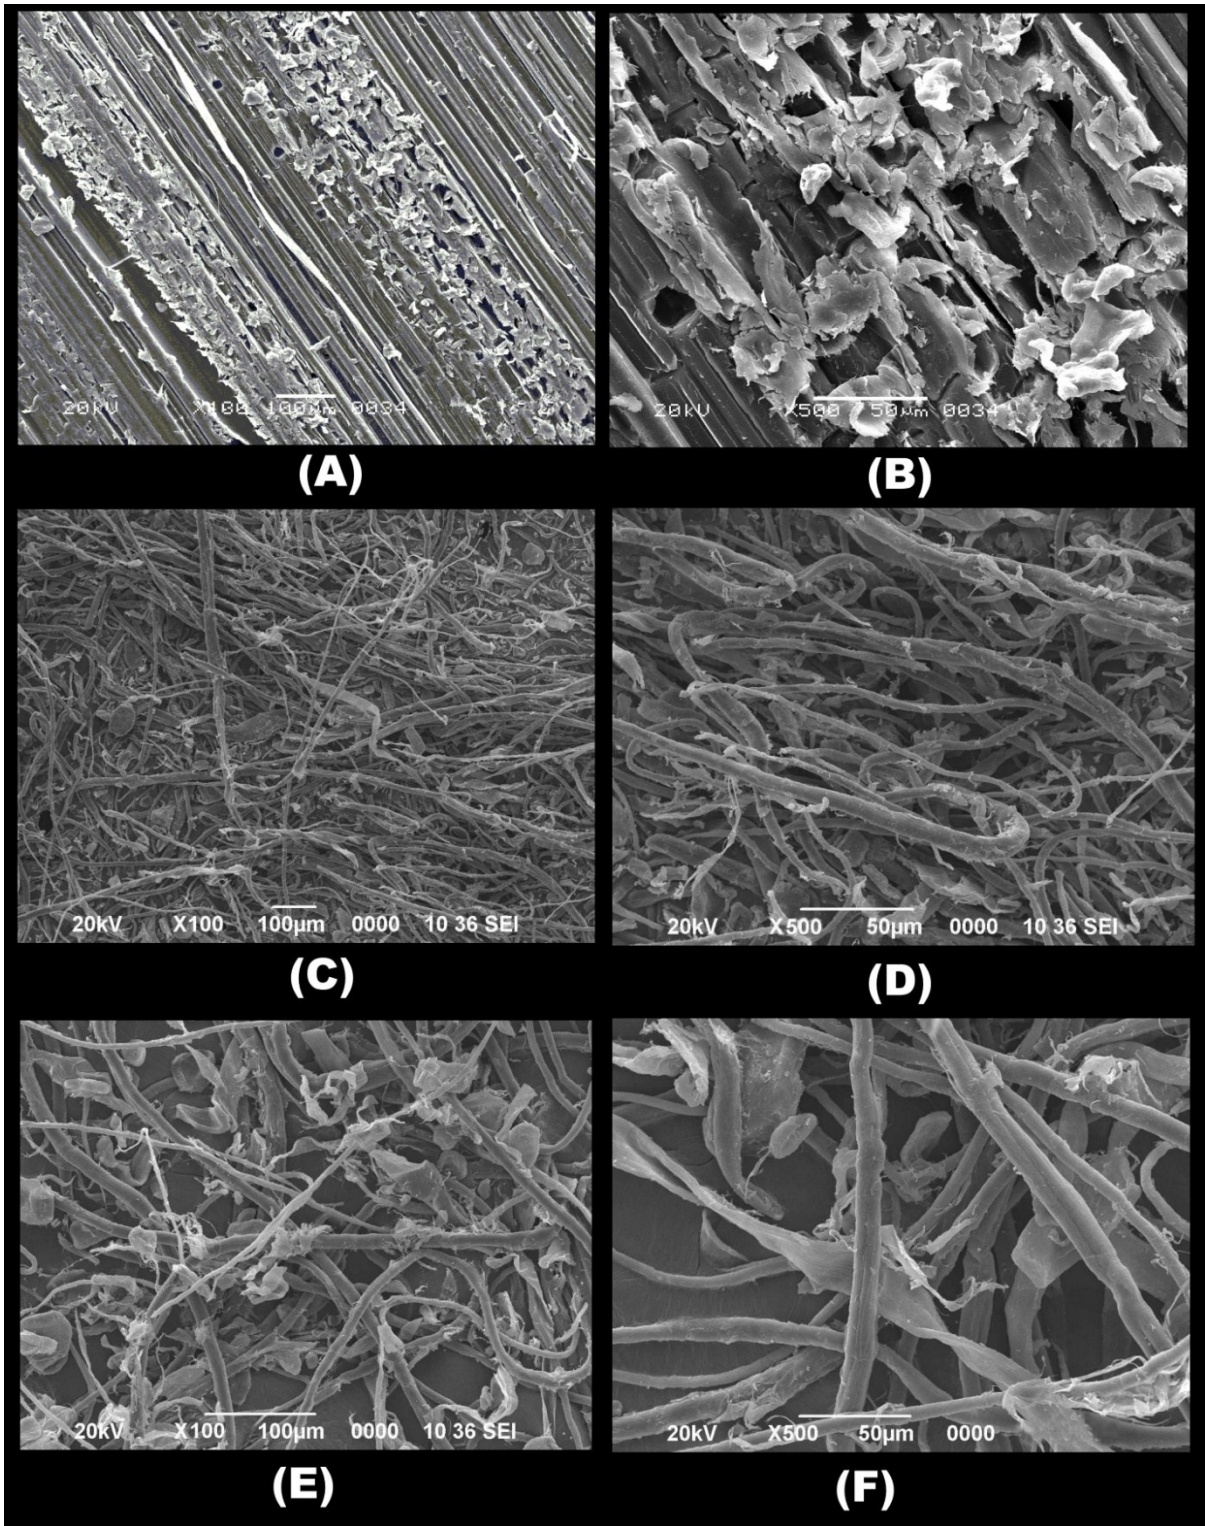

Fig.S2: SEM images of raw bamboo at (A) lower resolution and (B) higher resolution; treated pulp at (C) lower resolution and (D) higher resolution; and cellulose at (E) lower resolution and (F) higher resolution.

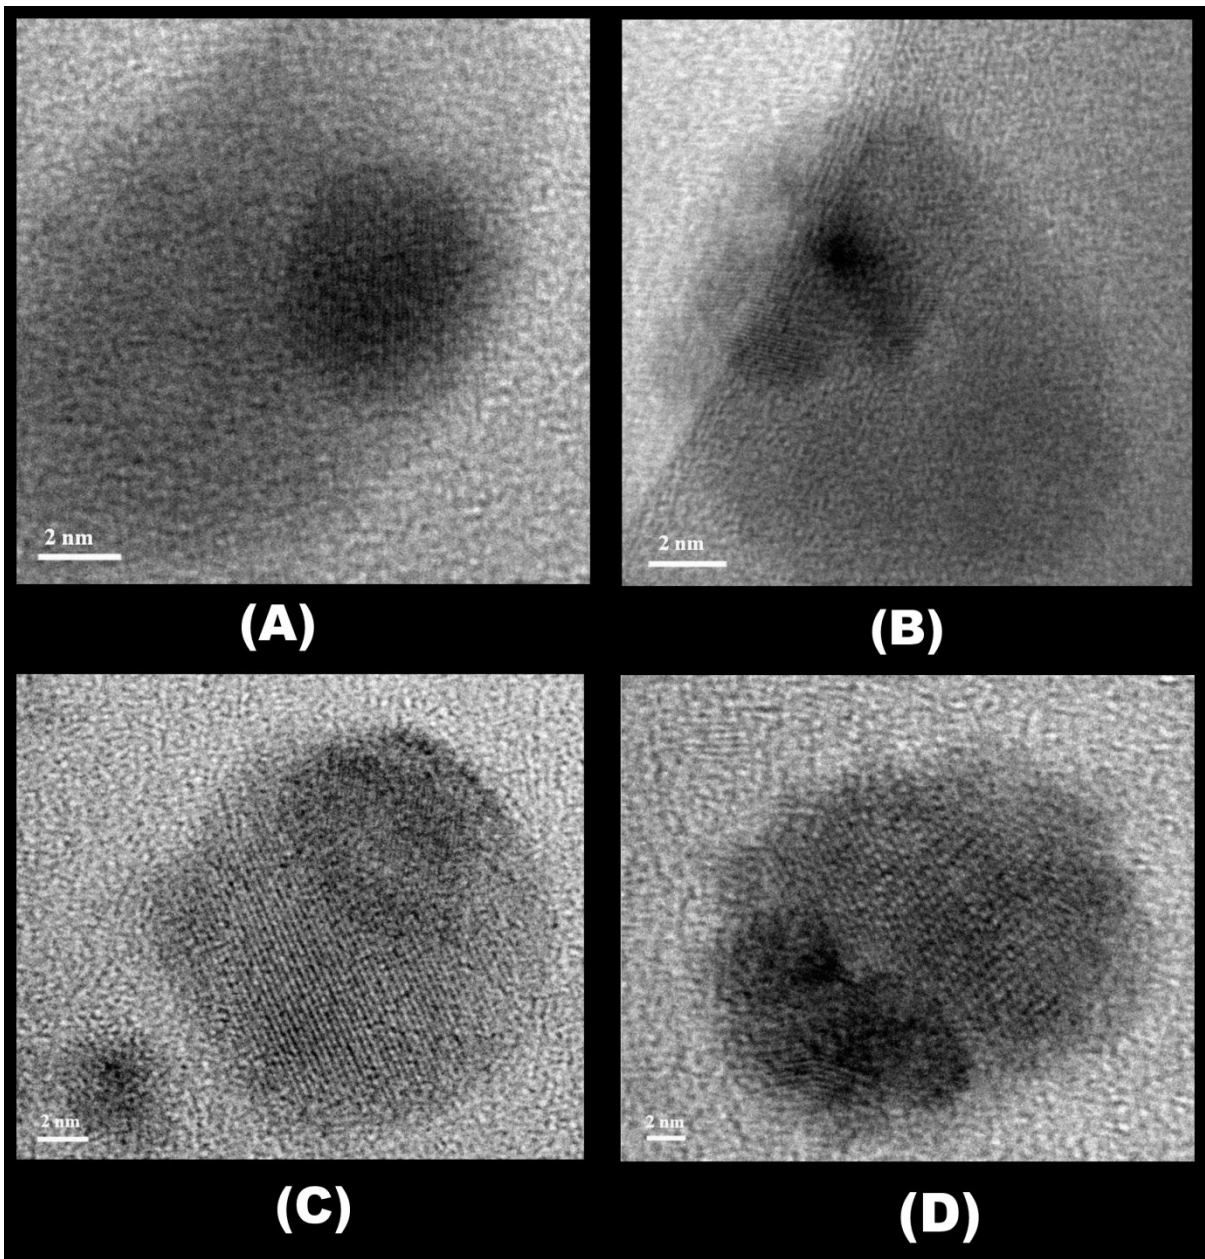

Fig.S3: HRTEM images with fringe spacing of Ag-Ag<sub>2</sub>S JNP (A-D).

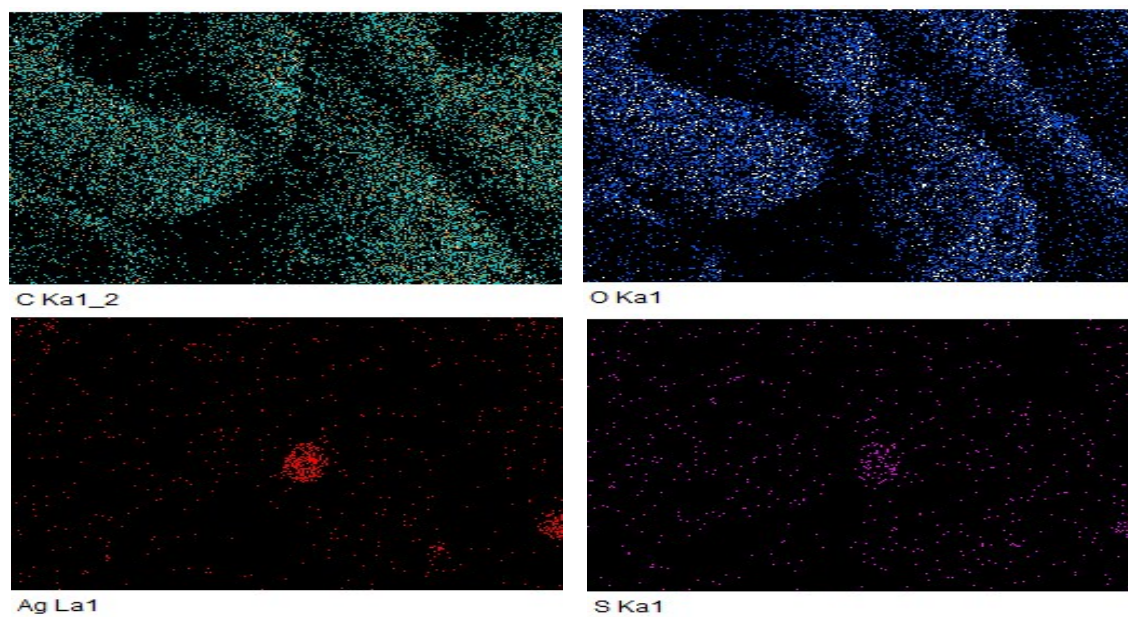

Fig. S4: Elemental dot mapping of C, O, Ag and S on the recovered catalyst surface after the 4<sup>th</sup> run.

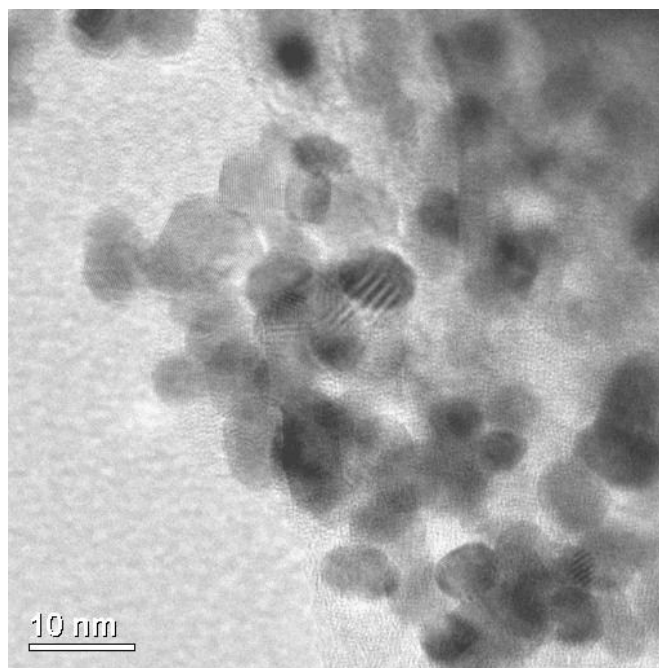

Fig.S5:HR-TEM image of recovered catalyst after 4<sup>th</sup> run.
